# Supplementary material
Source: PubMed Central journal article supplement (PMC7951561)
Supplement: mmc1.pdf [file mmc1.pdf]

**Immunity, Volume 54**

**Supplemental information**

**Longitudinal profiling of respiratory and systemic  
immune responses reveals myeloid  
cell-driven lung inflammation in severe COVID-19**

**Peter A. Szabo, Pranay Dogra, Joshua I. Gray, Steven B. Wells, Thomas J. Connors, Stuart P. Weisberg, Izabela Krupska, Rei Matsumoto, Maya M.L. Poon, Emma Idzikowski, Sinead E. Morris, Chloé Pasin, Andrew J. Yates, Amy Ku, Michael Chait, Julia Davis-Porada, Xinzheng V. Guo, Jing Zhou, Matthew Steinle, Sean Mackay, Anjali Saqi, Matthew R. Baldwin, Peter A. Sims, and Donna L. Farber**

A

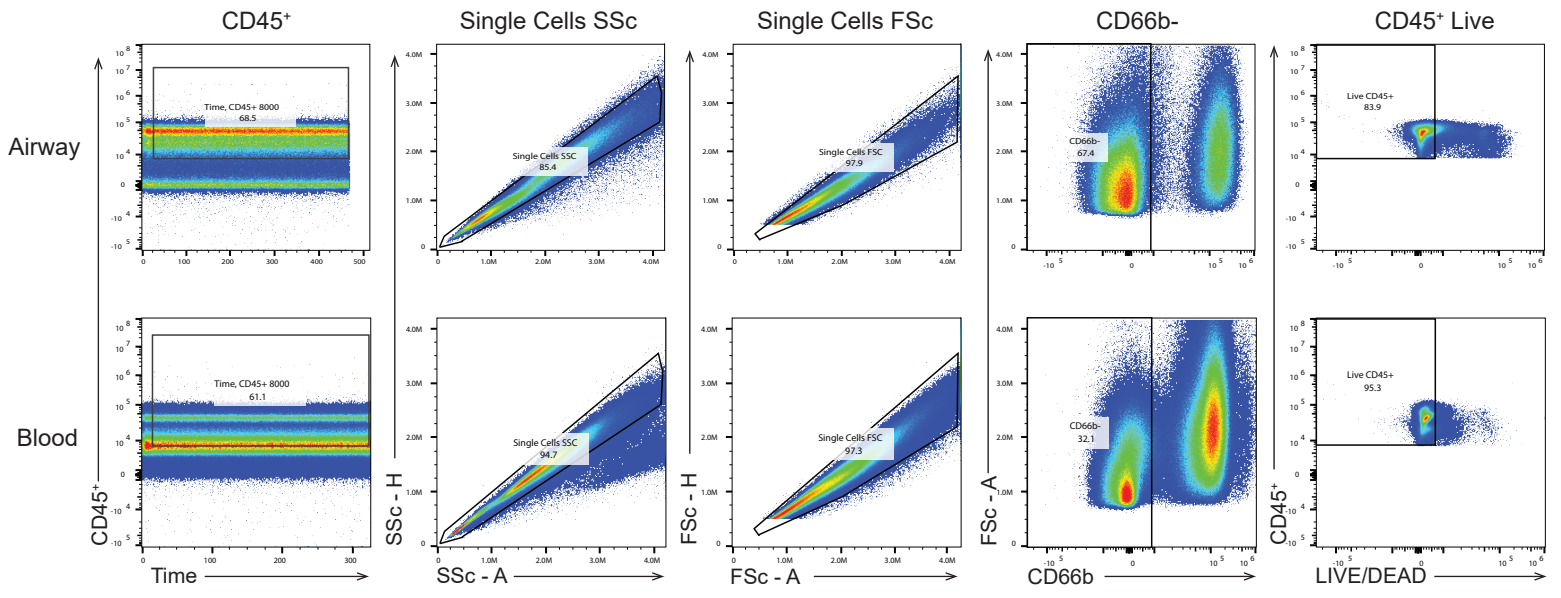

B

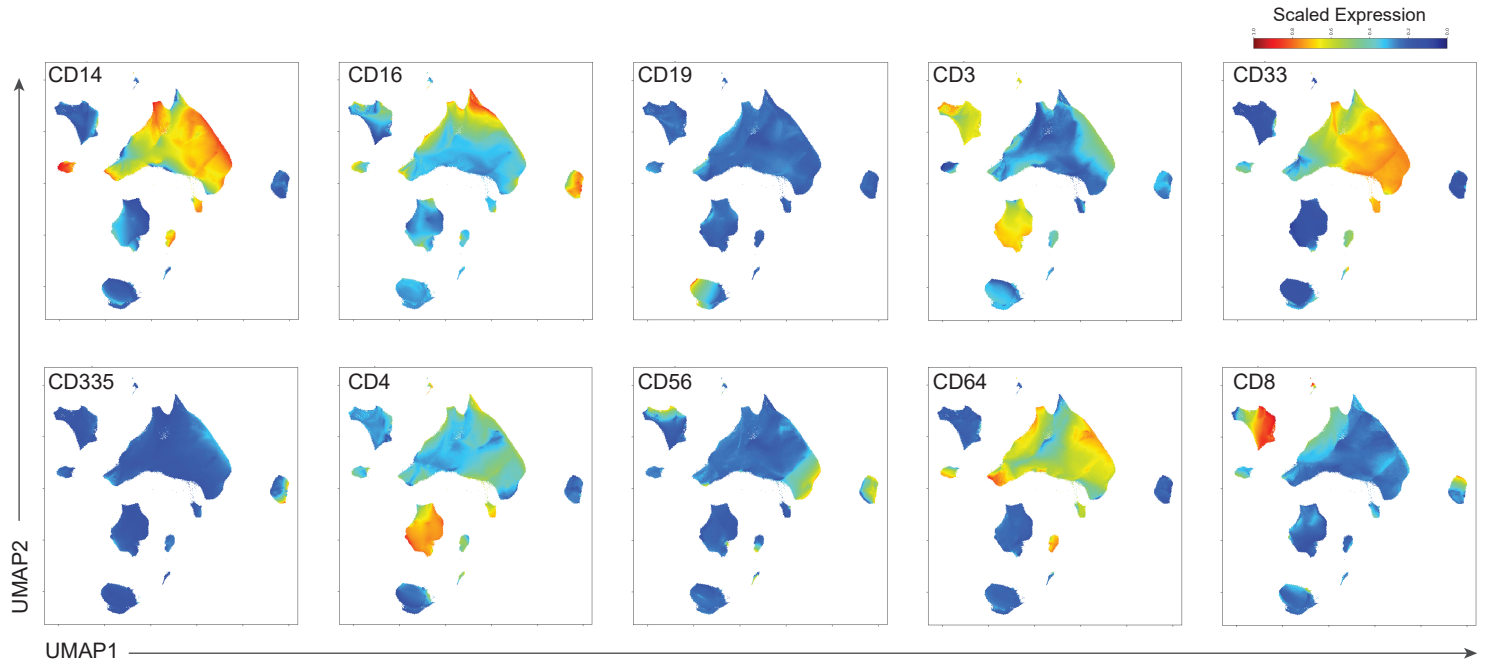



**Figure S1 related to Figure 1. Gating strategy for flow cytometry analysis and expression of lineage defining markers.** (A) FACS plots denoting the gating strategy used for analysis of myeloid and lymphocyte populations by flow cytometry from complex populations in airway samples, with complementary gating for blood cells. Total cells were initially gated on CD45<sup>+</sup> cells versus time to eliminate non-hematopoietic cells and debris; doublets were excluded followed by exclusion of neutrophils (FSC-A<sup>hi</sup> CD66b<sup>+</sup>). Finally, dead cells were excluded by gating on CD45<sup>+</sup> and LIVE/DEAD blue. The resulting populations contained the full complement of mononuclear immune cells used for downstream analysis. (B) UMAP embedding displaying expression of lineage-defining markers for the major immune cell subsets in combined airway and blood samples from 15 COVID-19 patients.

A

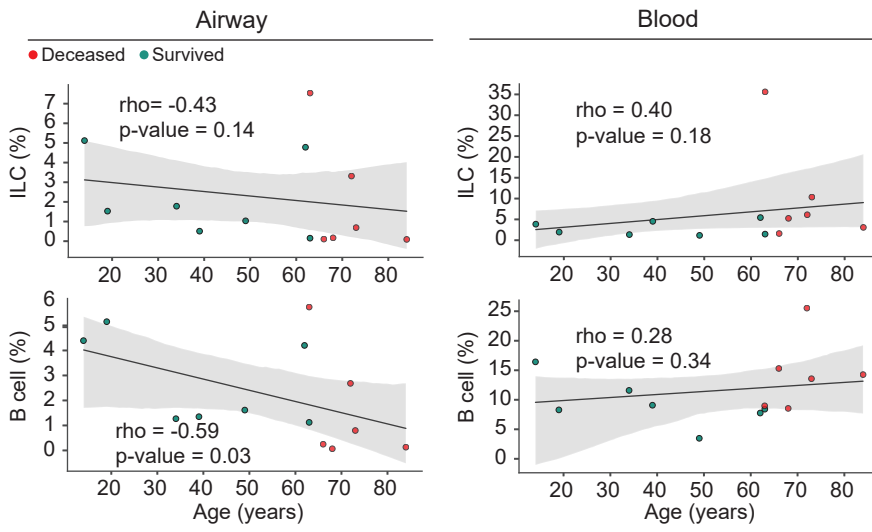

B

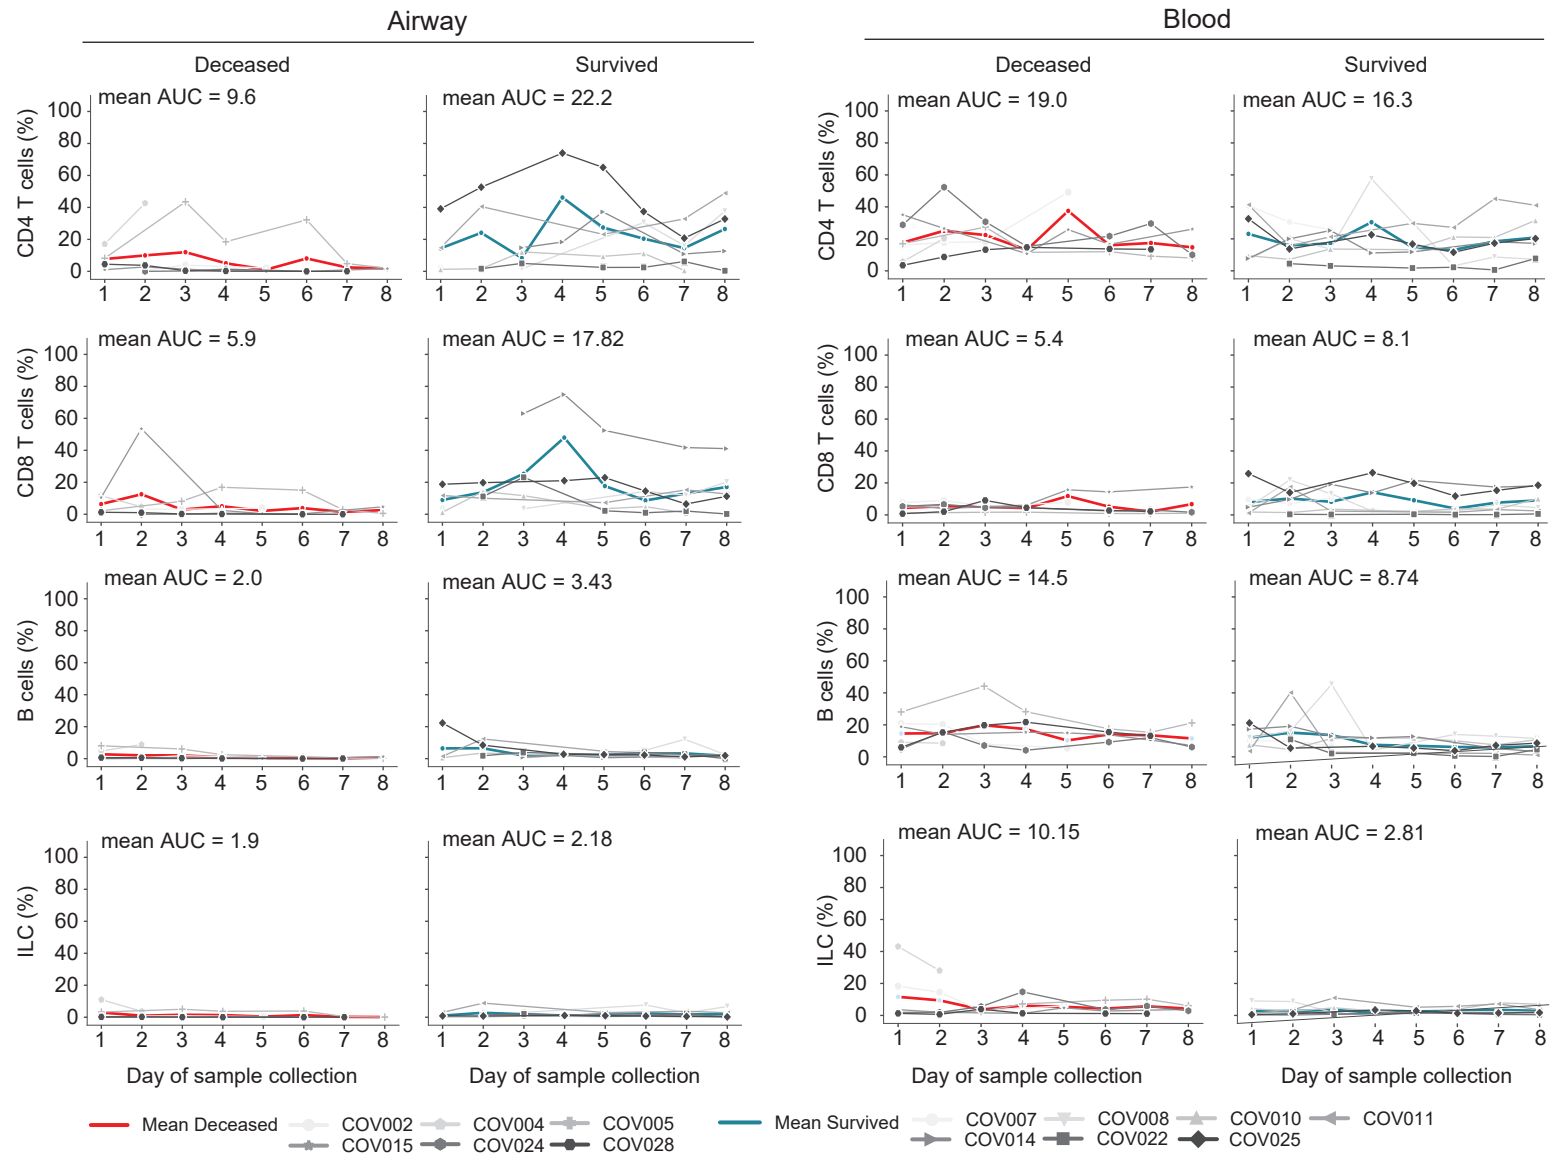

**Figure S2 related to Figure 2. Major immune cell lineages over time in COVID-19 patients.**

(A) Correlation of B cell and ILC frequency in the airways (left) and blood (right) with age. Each dot is representative of the mean immune cell frequency for each donor from all time points, and color denotes whether each patient survived (blue) or died (red). Statistical significance was calculated by Spearman correlation (showing  $\rho$ ). (B) Frequencies of CD4<sup>+</sup> T cells, CD8<sup>+</sup> T cells, B cells and ILCs in the airway (left) and blood (right) for each patient over time, separated by deceased and survived outcome. Solid red and blue lines show mean cell lineage frequency for deceased and survived patients respectively. Area-under-the-curve (AUC) was calculated for each patient, normalized for number of sampling days, and is shown as mean for each cell lineage and outcome.

A

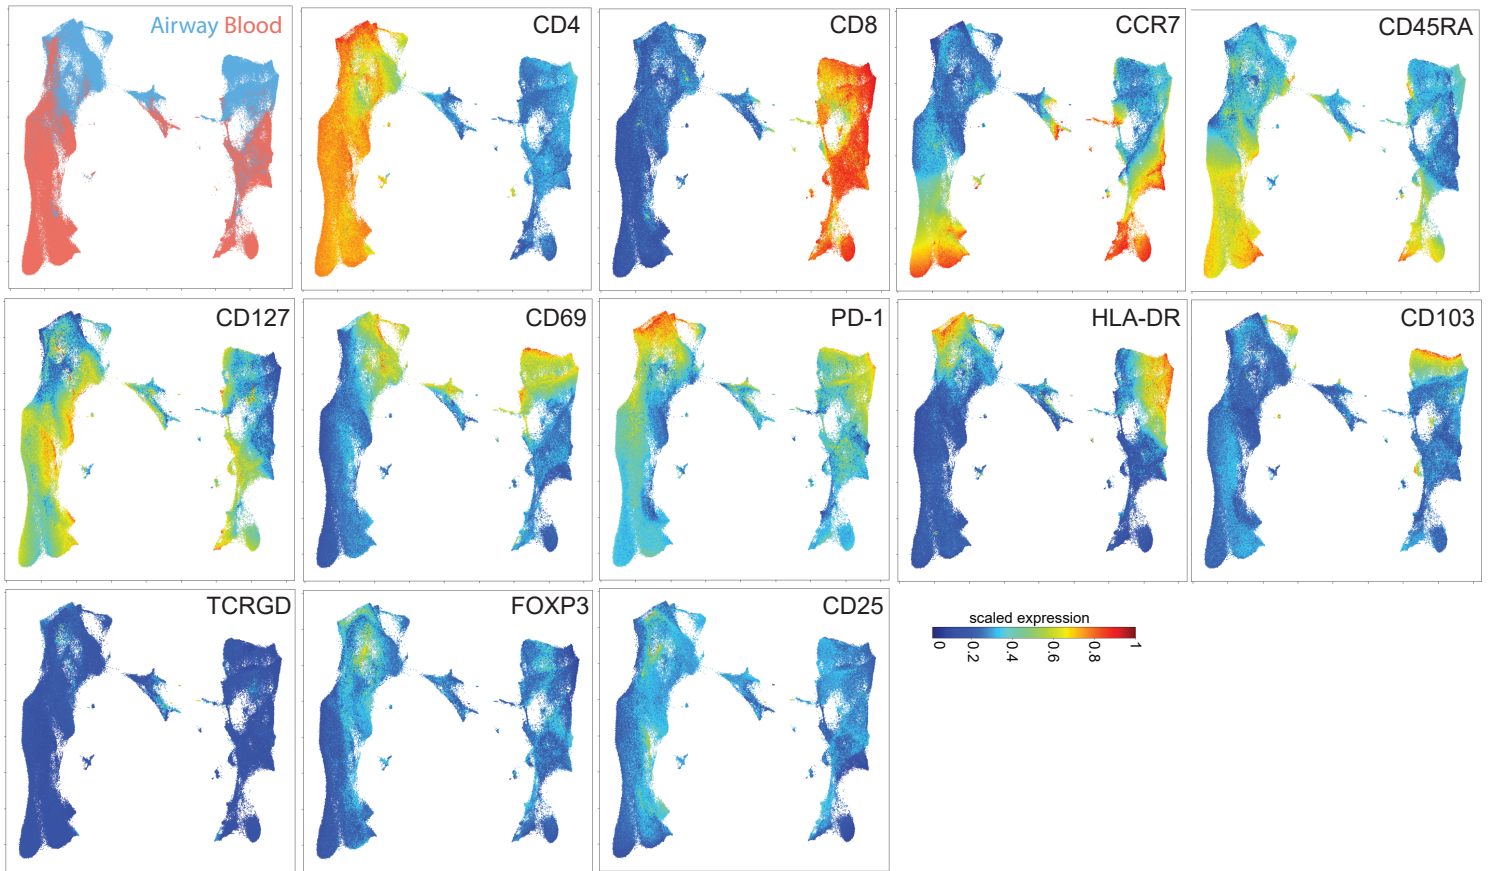

B

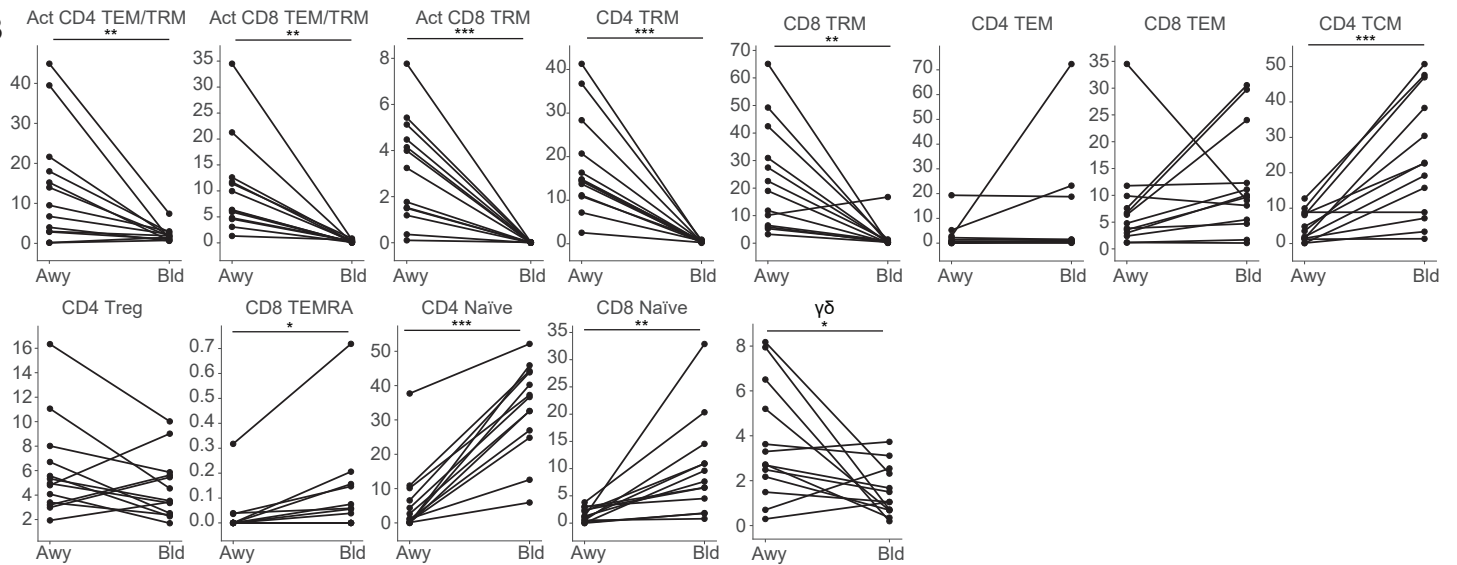

**Figure S3 related to Figure 3. T cell marker expression in the airways and blood of COVID-19 patients.** (A) UMAP embeddings indicating site of origin or scaled expression of indicated markers by flow cytometry in merged blood and airway samples from COVID-19 patients. (B) Paired quantitation of defined T cell subsets in blood and airway samples from COVID-19 patients. Statistical significance was calculated using a paired T-test and indicated by \*\*\*,  $p \leq 0.001$ ; \*\*,  $p \leq 0.01$ ; \*,  $p \leq 0.05$ .

A

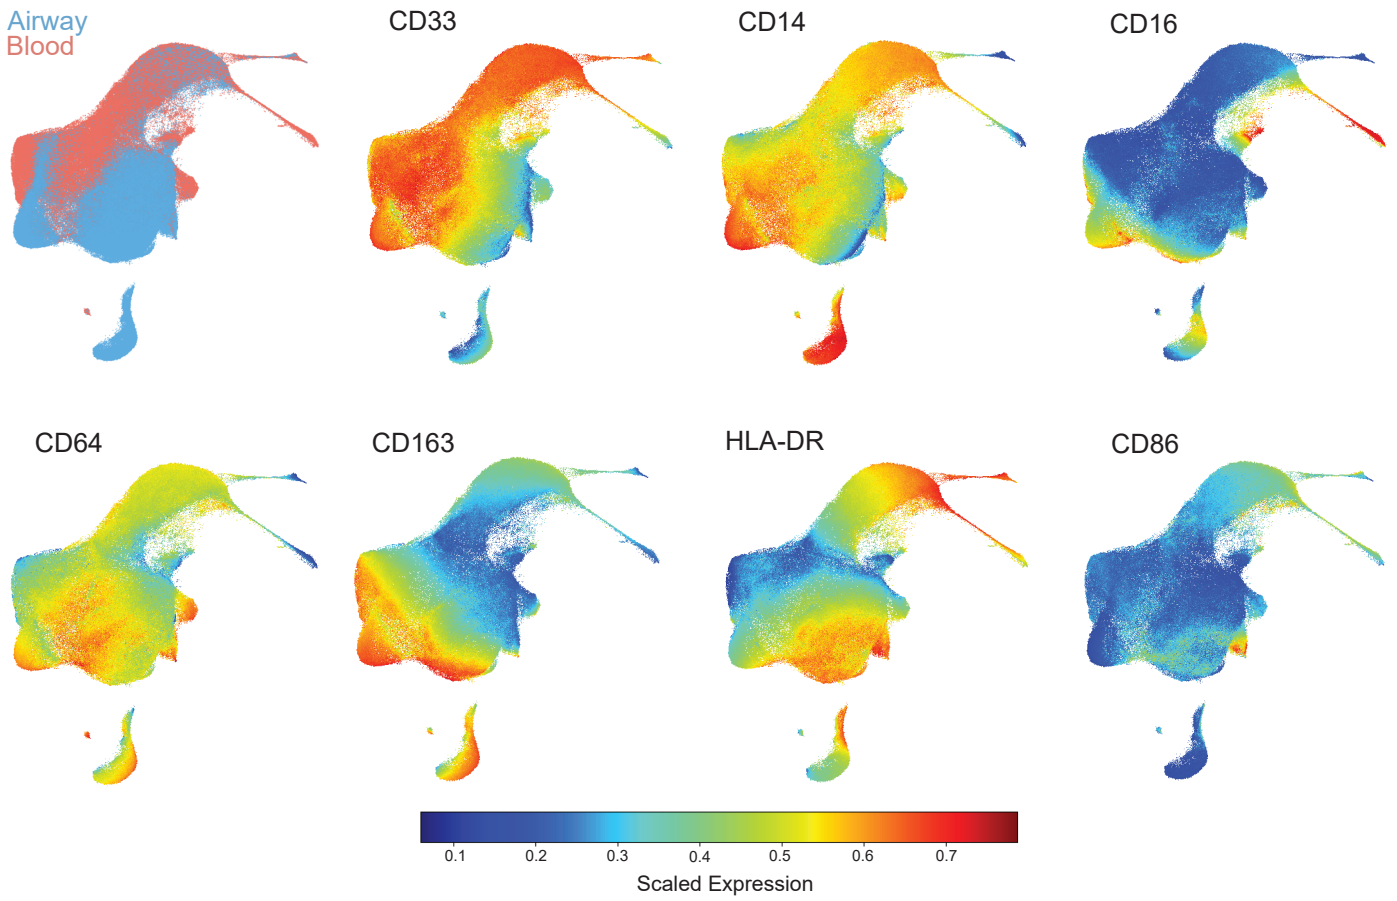

B

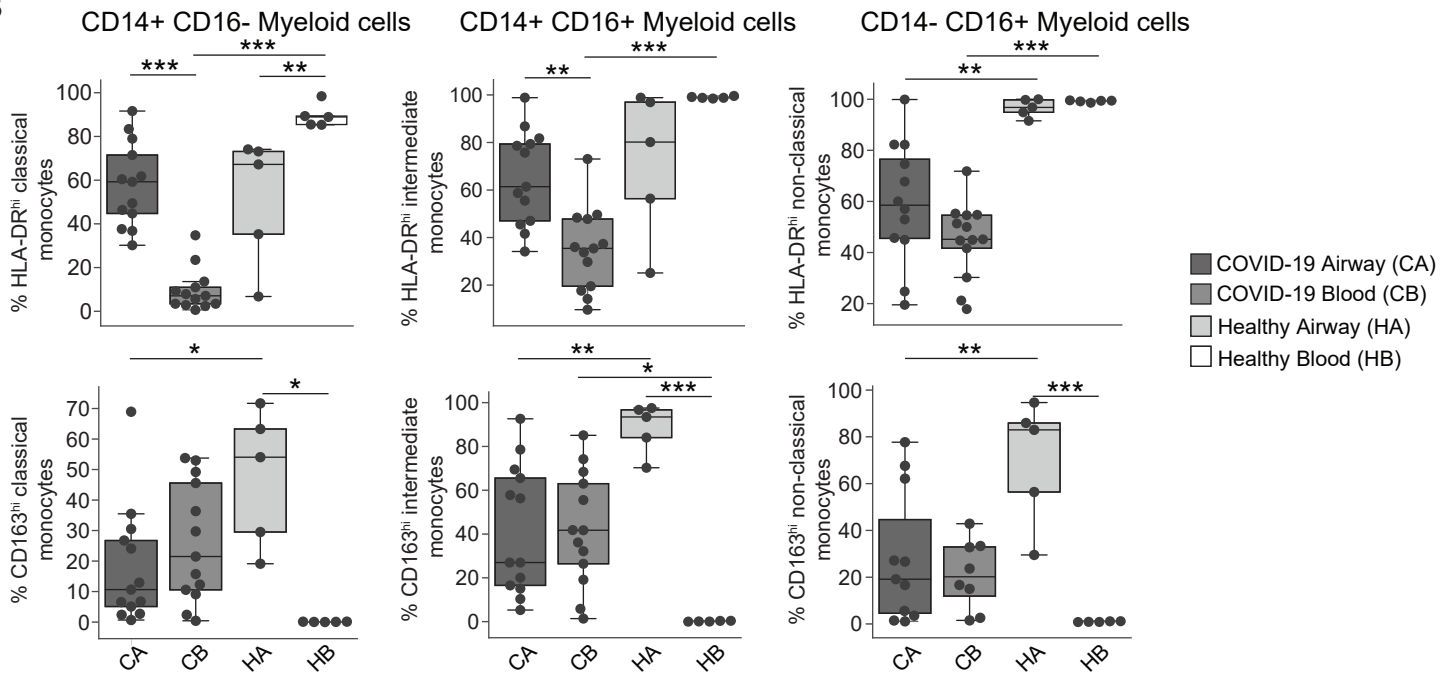

**Figure S4 related to Figure 4. Myeloid cell marker expression in blood and airways of COVID-19 patients and healthy controls.** (A) UMAP embeddings indicate site of origin for total myeloid cells in the airway (light blue) and blood (light red) of COVID-19 patients and healthy controls (top left) and scaled expression of indicated myeloid cell markers. (B) Boxplots indicate percent expression of HLA-DR (*top row*) and CD163 (*bottom row*) for the COVID-19 myeloid cell dataset gated according to classical nomenclature with CD14<sup>hi</sup> CD16<sup>lo</sup> designated as classical monocytes, CD14<sup>hi</sup> CD16<sup>hi</sup> as intermediate monocytes and CD14<sup>lo</sup> CD16<sup>hi</sup> and non-classical monocytes. Statistical significance was calculated using a one-way ANOVA followed by a Tukey HSD and indicated by \*\*\*,  $p \leq 0.001$ ; \*\*,  $p \leq 0.01$ ; \*,  $p \leq 0.05$ .

A

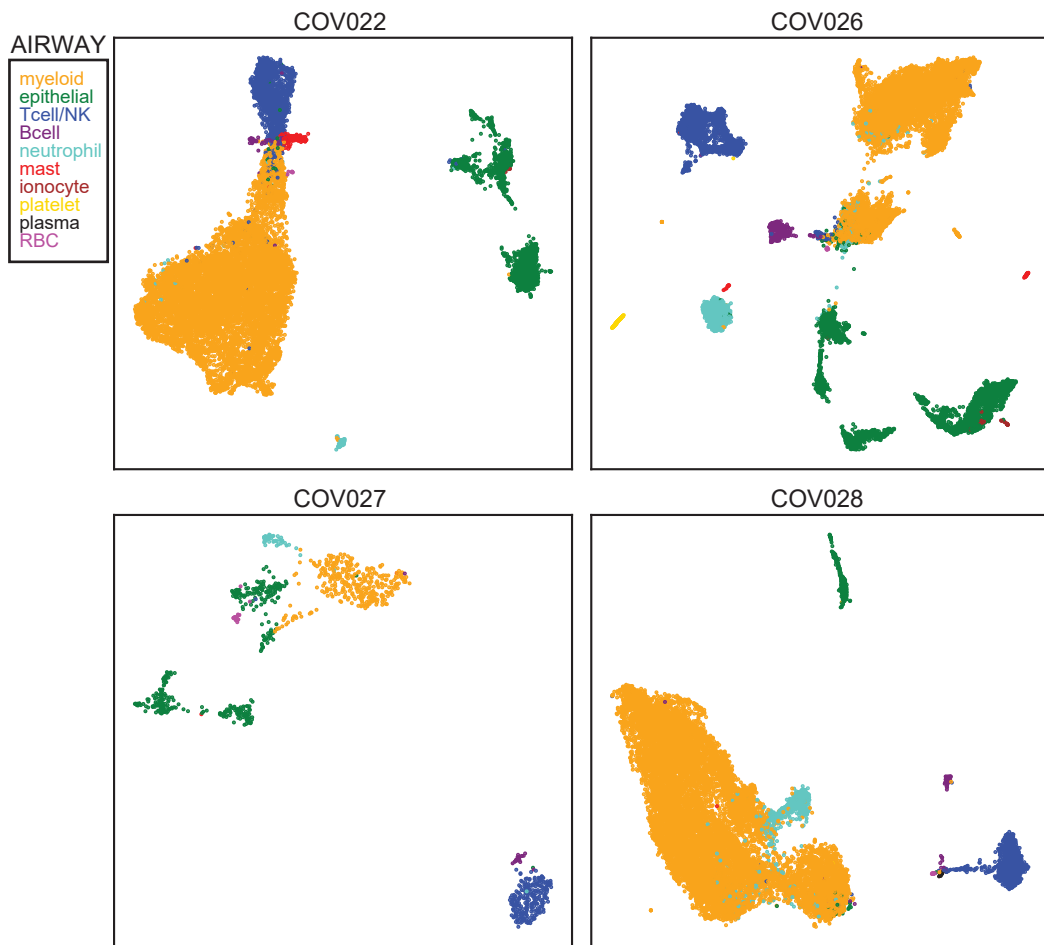

B

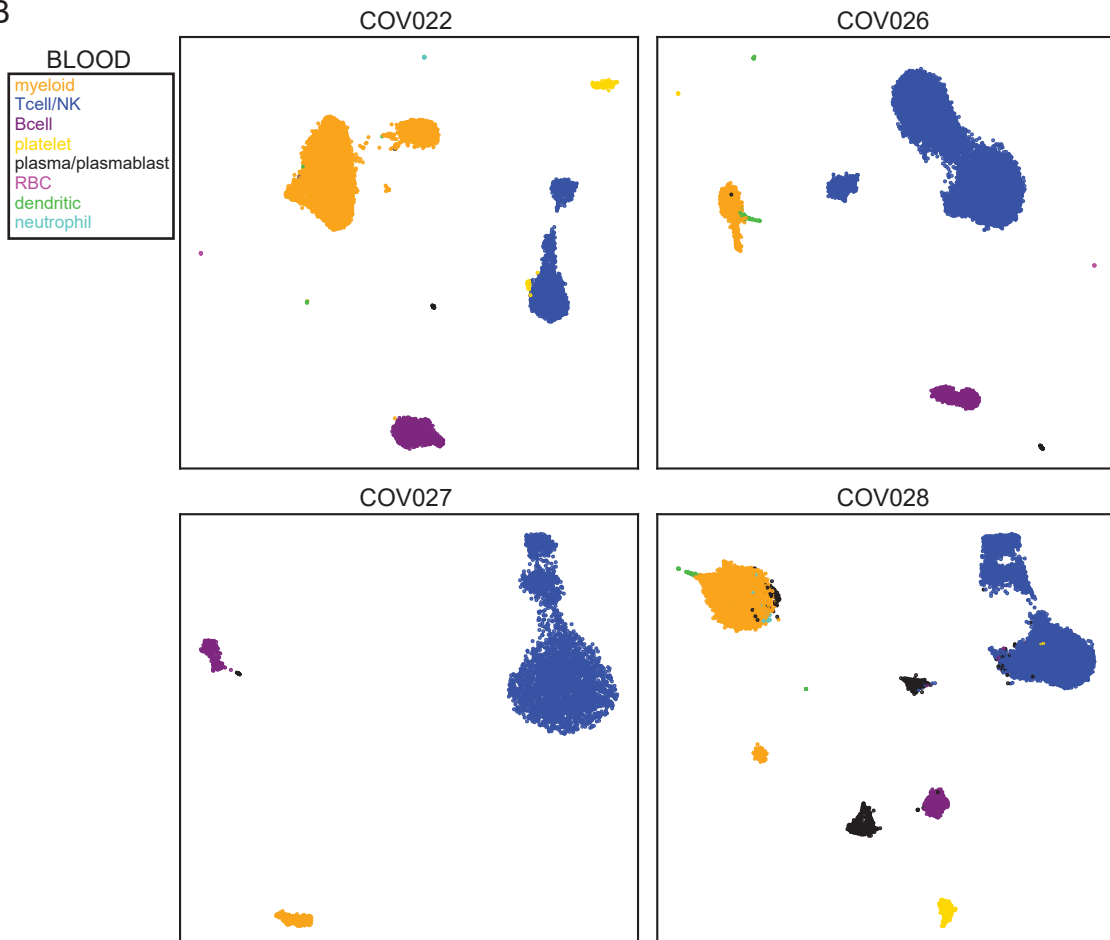



**Figure S5 related to Figure 5. UMAPs of major immune lineages by scRNA-seq.**

(A) UMAP of scRNA-seq data displaying all cells in airway samples from all timepoints for each patient. (B) UMAP of scRNA-seq data displaying all cells present in blood samples from all timepoints for each patient.

A

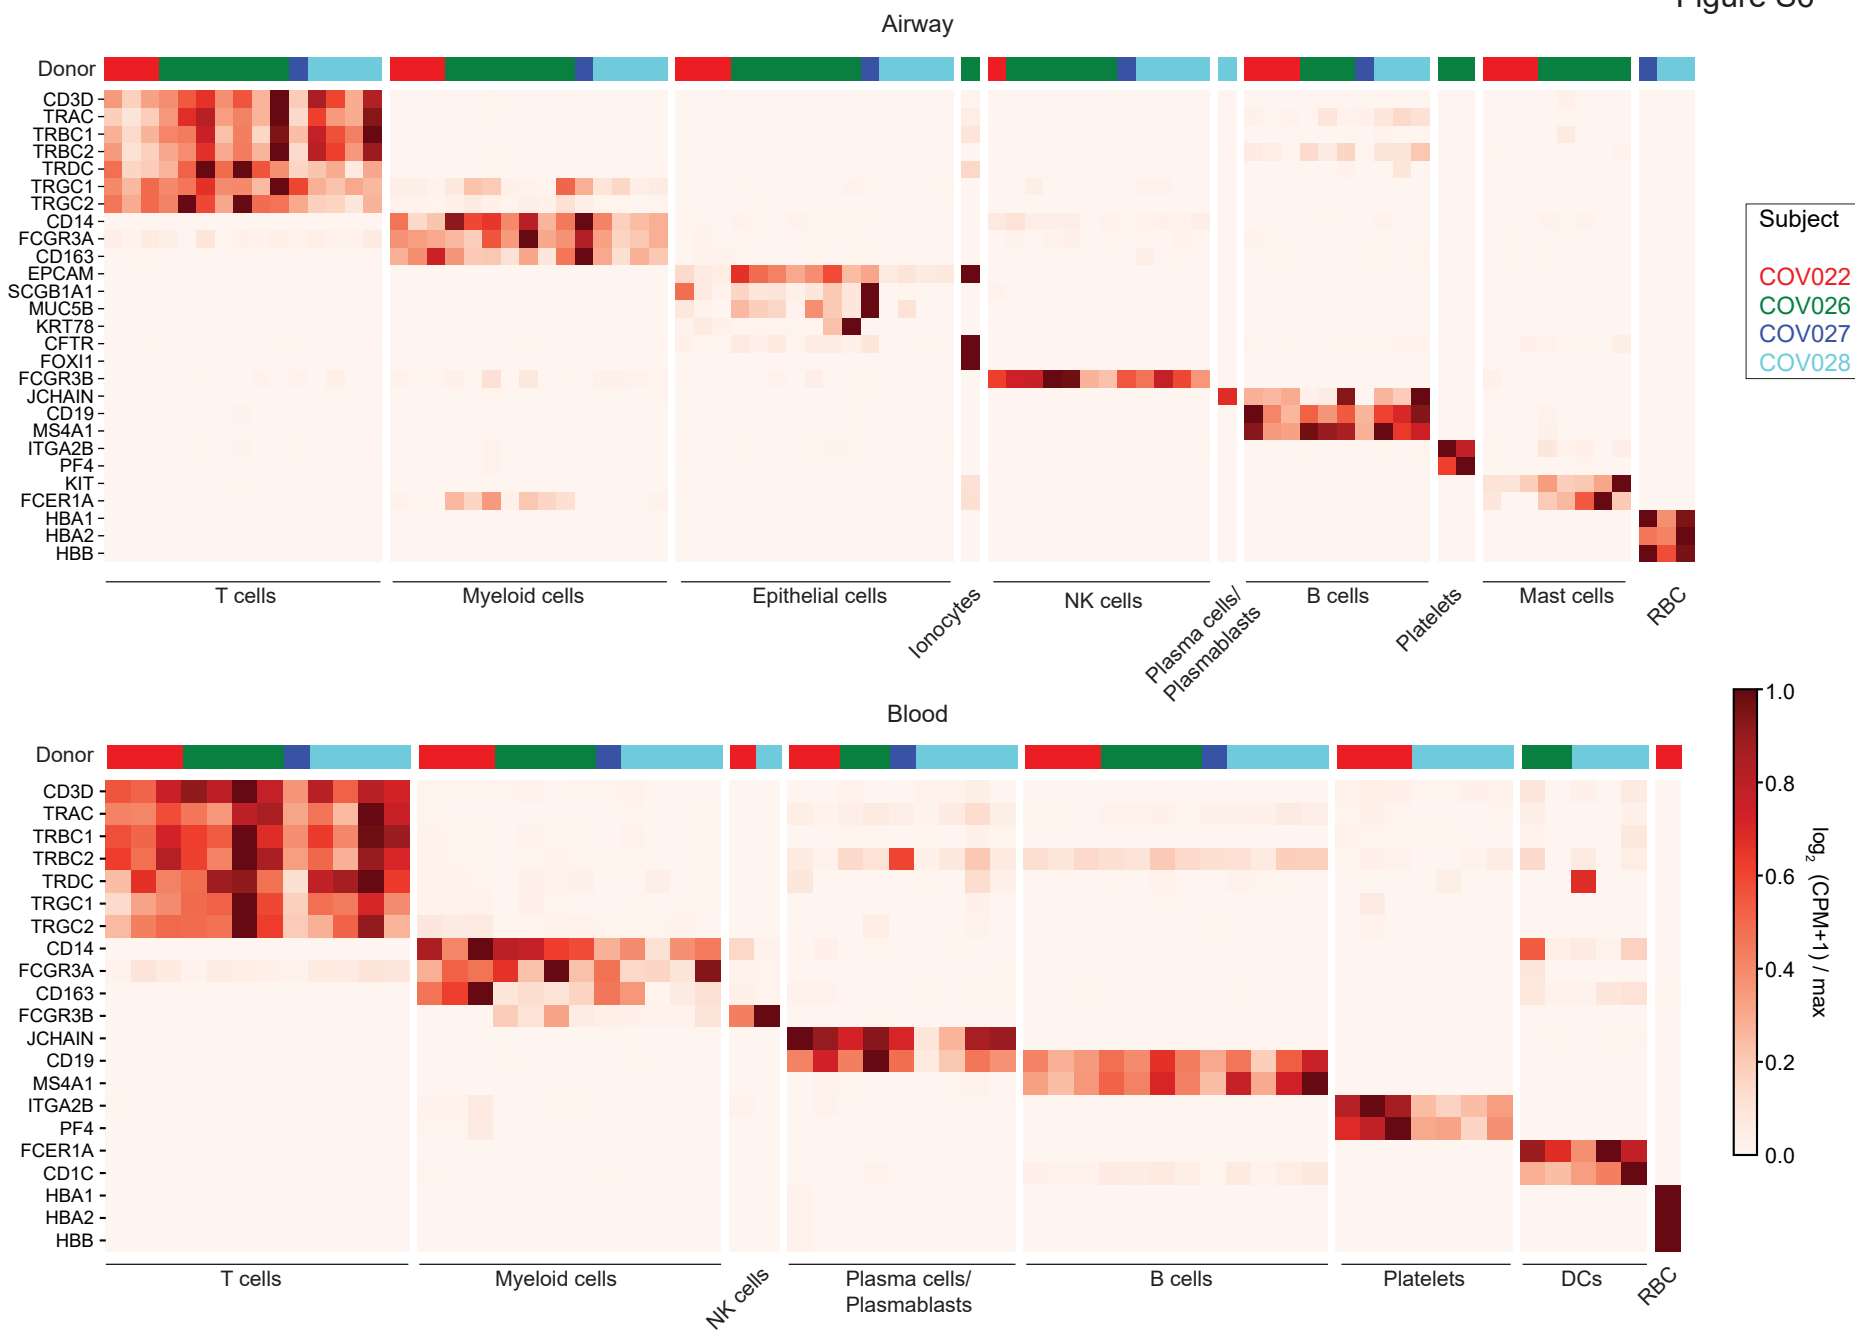

B

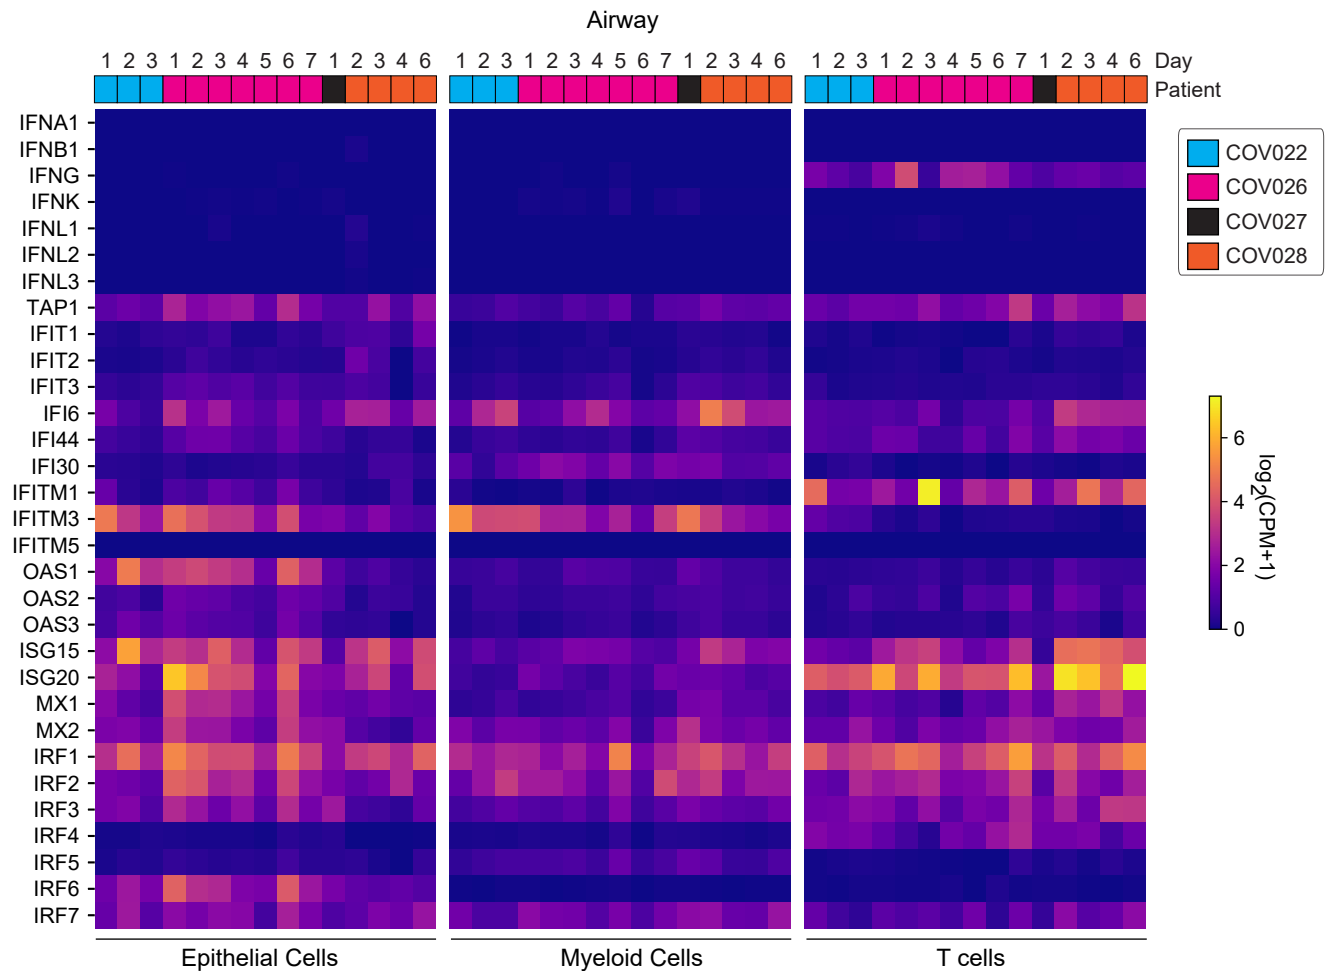

**Figure S6 related to Figure 5. scRNA-seq analysis identifies specific features of immune cell types in airway and blood of COVID-19 patients.** (A) Heatmap of scRNA-seq data displaying gene expression of lineage defining markers for both the airway and blood across the four patients. Heatmap data are colored by  $\log_2(\text{CPM}+1)/\text{max}$  values for each sample. (B) Heatmap showing  $\log_2(\text{CPM}+1)$  expression of *IFN* and *IFN*-related genes by the indicated airway cell types as determined by scRNA-seq for each patient sample, indicated by color.

A

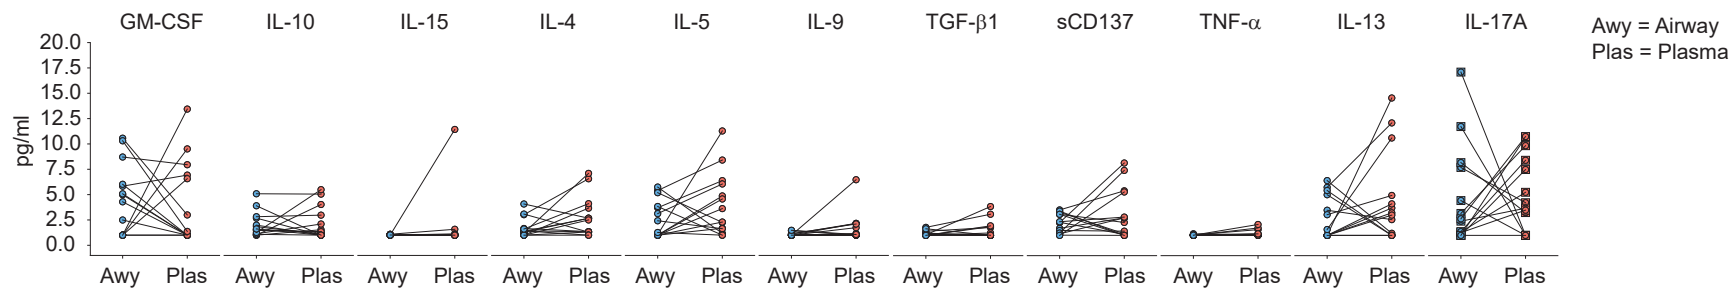

B

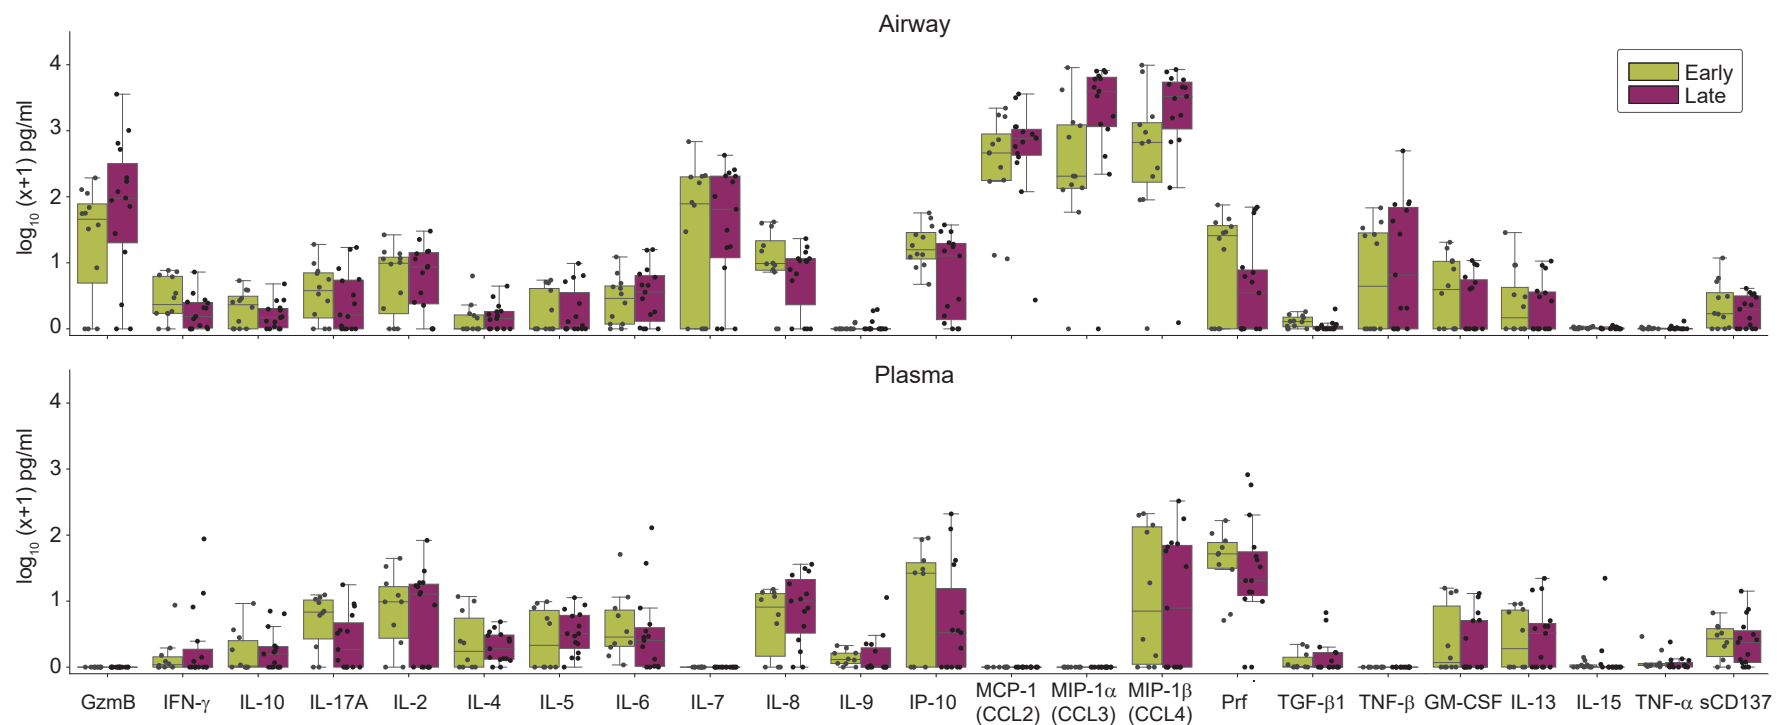

**Figure S7 related to Figure 6. Airway is the major site for production of inflammatory cytokines and chemokines in COVID-19 patients.** (A) Pairwise comparison of cytokine levels averaged across both timepoints in airway wash and blood plasma samples collected from 15 patients. A p-value of  $< 0.05$  was considered significant. For figures, p-value  $< 0.05 = *$ , p-value  $< 0.01 = **$  and p-value  $< 0.001 = ***$ . (B) Box plots showing  $\log_{10}(X+1)$  normalized cytokine expression profiles in the airway wash (top) and blood plasma (bottom) samples for an early and late time point collected from 15 patients. Each dot represents an individual data point.

**Table S1. Related to Figures 1-6.** Clinical information for COVID-19 patients in this study.

|                                                                                                                                                                         | Deceased (n=8)   | Survived (n=7)    | P value |
|-------------------------------------------------------------------------------------------------------------------------------------------------------------------------|------------------|-------------------|---------|
| <b>Clinical Characteristics</b>                                                                                                                                         |                  |                   |         |
| Age, years median (range)                                                                                                                                               | 72.5 (63-84)     | 39 (14- 63)       | 0.0005  |
| Sex, male, n (%)                                                                                                                                                        | 5 (62.5%)        | 4 (57.1%)         |         |
| Body Mass Index, kg/m2, median (IQR)                                                                                                                                    | 31.1 (29.3-35.0) | 36.3 (30.5-39.4)  | 0.6200  |
| SOFA, median (IQR) <sup>a</sup>                                                                                                                                         | 11.5 (10.3-14.8) | 12 (10.5-13.5)    | 0.9826  |
| Acute Respiratory Distress Syndrome, n (%)                                                                                                                              | 8 (100%)         | 7 (100%)          |         |
| SARS-CoV-2 PCR Positive                                                                                                                                                 | 8 (100%)         | 7 (100%)          |         |
| Days Post Symptom Onset, median (IQR) <sup>b</sup>                                                                                                                      | 13.5 (8.8-16.5)  | 12 (9-13)         | 0.5523  |
| Hospitalization, Days, median (range)                                                                                                                                   | 14.5 (1-36)      | 43 (19-88)        | 0.0140  |
| <b>Race or Ethnic Group, n (%)<sup>c</sup></b>                                                                                                                          |                  |                   |         |
| Hispanic or Latino                                                                                                                                                      | 2 (25%)          | 2 (28.6%)         |         |
| Black or African American                                                                                                                                               | 0 (0%)           | 3 (42.9%)         |         |
| White                                                                                                                                                                   | 2 (25%)          | 2 (28.6%)         |         |
| Other or Unknown                                                                                                                                                        | 6 (75%)          | 2 (28.6%)         |         |
| <b>Co-Morbidities, n (%)</b>                                                                                                                                            |                  |                   |         |
| Hypertension                                                                                                                                                            | 6 (75%)          | 1 (14.3%)         |         |
| Diabetes                                                                                                                                                                | 3 (37.5%)        | 2 (28.6%)         |         |
| Chronic Cardiac Disease                                                                                                                                                 | 0 (0%)           | 0 (0%)            |         |
| Current or Former Smoker                                                                                                                                                | 3 (37.5%)        | 1 (14.3%)         |         |
| Chronic Obstructive Pulmonary Disease                                                                                                                                   | 1 (12.5%)        | 1 (14.3%)         |         |
| Chronic Neurologic Diseases and Dementia                                                                                                                                | 1 (12.5%)        | 0 (0%)            |         |
| Asthma                                                                                                                                                                  | 1 (12.5%)        | 1 (14.3%)         |         |
| <b>Laboratory Values, Median (IQR)<sup>a</sup></b>                                                                                                                      |                  |                   |         |
| Absolute Neutrophil Count, x10(3)/μL                                                                                                                                    | 17.2 (12.7-23.2) | 15.1 (11.7-28.5)  | 0.8333  |
| Absolute Lymphocyte Count, x10(3)/μL                                                                                                                                    | 0.95 (0.74-1.27) | 0.64 (0.52-1.05)  | 0.5237  |
| Absolute Monocyte Count, x10(3)/μL                                                                                                                                      | 0.86 (0.63-1.26) | 0.77 (0.52-0.87)  | 0.5556  |
| D-Dimer, μg/mL <sup>d</sup>                                                                                                                                             | 7.5 (3.3-14.3)   | 10.2 (2.8-17.9)   | 0.9860  |
| Ferritin, ng/mL                                                                                                                                                         | 1250 (636-2580)  | 1767 (806-3929)   | 0.6943  |
| High Sensitivity C-reactive Protein, mg/L <sup>d</sup>                                                                                                                  | 75 (38-157)      | 94 (24-199)       | 0.4557  |
| Interleukin-6, pg/mL <sup>d</sup>                                                                                                                                       | 121.7 (86.9-315) | 64.5 (13.9-226.1) | 0.1732  |
| Lactate Dehydrogenase, U/L                                                                                                                                              | 646 (614-1129)   | 598 (287-1052)    | 0.4452  |
| PaO <sub>2</sub> /FiO <sub>2</sub> ratio                                                                                                                                | 122 (83-153)     | 168 (119-180)     | 0.3969  |
| <b>Treatment, n (%)<sup>e</sup></b>                                                                                                                                     |                  |                   |         |
| Convalescent Plasma                                                                                                                                                     | 0 (0%)           | 4 (57.1%)         | 0.0125  |
| Intravenous Immunoglobulin                                                                                                                                              | 0 (0%)           | 1 (14.3%)         | 0.2685  |
| Monoclonal Antibody Therapy <sup>f</sup>                                                                                                                                | 3 (37.5%)        | 2 (28.6%)         | 0.7144  |
| Remdesivir                                                                                                                                                              | 5 (62.5%)        | 2 (28.6%)         | 0.1888  |
| Steroids <sup>g</sup>                                                                                                                                                   | 8 (100%)         | 5 (71%)           | 0.2000  |
| Abbreviations: SOFA - Sequential Organ Failure Assessment Score, PaO <sub>2</sub> – arterial partial pressure of oxygen, FiO <sub>2</sub> – fraction of inspired oxygen |                  |                   |         |
| a First available value within 48 hours of study enrollment                                                                                                             |                  |                   |         |
| b Days from onset of respiratory symptoms to study enrollment                                                                                                           |                  |                   |         |
| c Subjects included in all categories for which they identified                                                                                                         |                  |                   |         |
| d Values above upper limits of test entered as; D-Dimer (20mg/mL), C-reactive Protein (200mg/L), Interleukin-6 (315pg/mL)                                               |                  |                   |         |
| e All samples obtained during or post-treatment. Treatments initiated after study completion include: Hydrocortisone (n=3 Survived), Remdesivir (n=2, Survived)         |                  |                   |         |
| f Tocilizumab (n=2 Deceased, n=2 Survived), enrolled in double-blind randomized controlled Sarilumab trial (n=1 Deceased)                                               |                  |                   |         |
| g Hydrocortisone or Methylpredisone                                                                                                                                     |                  |                   |         |
| All statistical testing done with 2 tailed Mann-Whitney Test, Chi-squared Test, or Fischer's Exact test.                                                                |                  |                   |         |

**Table S2. Related to Figure 1.** Number of paired airway and blood samples obtained from individual COVID-19 patients and assays performed with the samples.

| <b>Study ID</b> | <b>Age/Sex</b> | <b>Outcome</b> | <b>#paired samples</b> | <b>Flow Cytometry</b> | <b>Cytokines</b> | <b>scRNAseq</b> |
|-----------------|----------------|----------------|------------------------|-----------------------|------------------|-----------------|
| COV002          | 73M            | Deceased       | 4                      | X                     | X                |                 |
| COV004          | 63M            | Deceased       | 2                      | X                     |                  |                 |
| COV005          | 72M            | Deceased       | 7                      | X                     | X                |                 |
| COV007          | 63F            | Survived       | 4                      | X                     | X                |                 |
| COV008          | 14F            | Survived       | 10                     | X                     | X                |                 |
| COV010          | 39M            | Survived       | 6                      | X                     | X                |                 |
| COV011          | 62M            | Survived       | 7                      | X                     | X                |                 |
| COV014          | 34F            | Survived       | 7                      | X                     | X                |                 |
| COV015          | 84M            | Deceased       | 7                      | X                     | X                |                 |
| COV022          | 49M            | Survived       | 7                      | X                     | X                | X               |
| COV024          | 68M            | Deceased       | 7                      | X                     | X                |                 |
| COV025          | 19M            | Survived       | 8                      | X                     | X                |                 |
| COV026          | 74F            | Deceased       | 7                      |                       | X                | X               |
| COV027          | 82F            | Deceased       | 1                      |                       |                  | X               |
| COV028          | 66F            | Deceased       | 6                      | X                     | X                | X               |

**Table S3. Related to Figures 1, 5-7. Summary of sample details for scRNA-seq analysis.**

| <b>Sample Name</b> | <b>Patient ID</b> | <b>Days Post-Intubation</b> | <b>Sample Source</b> | <b>Number of Cells</b> |
|--------------------|-------------------|-----------------------------|----------------------|------------------------|
| COV022A1           | COV022            | 1                           | Airway Wash          | 2,489                  |
| COV022A2           | COV022            | 2                           | Airway Wash          | 9,852                  |
| COV022A3           | COV022            | 3                           | Airway Wash          | 2,487                  |
| COV022B1           | COV022            | 1                           | Fresh PBMCs          | 4,603                  |
| COV022B2           | COV022            | 2                           | Fresh PBMCs          | 11,574                 |
| COV022B3           | COV022            | 3                           | Fresh PBMCs          | 9,337                  |
| COV026A1           | COV026            | 1                           | Airway Wash          | 4,651                  |
| COV026A2           | COV026            | 3                           | Airway Wash          | 5,834                  |
| COV026A3           | COV026            | 4                           | Airway Wash          | 4,147                  |
| COV026A4           | COV026            | 5                           | Airway Wash          | 1,324                  |
| COV026A5           | COV026            | 6                           | Airway Wash          | 2,834                  |
| COV026A6           | COV026            | 7                           | Airway Wash          | 810                    |
| COV026A7           | COV026            | 8                           | Airway Wash          | 2,065                  |
| COV026B2           | COV026            | 3                           | Frozen PBMCs         | 5,608                  |
| COV026B3           | COV026            | 4                           | Frozen PBMCs         | 5,080                  |
| COV026B6           | COV026            | 7                           | Frozen PBMCs         | 4,846                  |
| COV026B7           | COV026            | 8                           | Frozen PBMCs         | 4,755                  |
| COV027A1           | COV027            | 1                           | Airway Wash          | 1,074                  |
| COV027B1           | COV027            | 1                           | Frozen PBMCs         | 4,232                  |
| COV028A2           | COV028            | 2                           | Airway Wash          | 7,025                  |
| COV028A3           | COV028            | 3                           | Airway Wash          | 3,434                  |
| COV028A4           | COV028            | 4                           | Airway Wash          | 2,598                  |
| COV028A6           | COV028            | 7                           | Airway Wash          | 4,594                  |
| COV028B2           | COV028            | 2                           | Fresh PBMCs          | 7,097                  |
| COV028B3           | COV028            | 3                           | Fresh PBMCs          | 4,792                  |
| COV028B4           | COV028            | 4                           | Fresh PBMCs          | 5,696                  |
| COV028B6           | COV028            | 7                           | Fresh PBMCs          | 3,726                  |



**Table S4. Related to Figure 1.** PCA loadings of markers for PC1 and PC2 for plots in Figure 1B.

| <b>Marker</b> | <b>PC1</b> | <b>PC2</b> |
|---------------|------------|------------|
| CD3           | 0.077054   | 0.006976   |
| CD27          | 0.058595   | -0.02115   |
| CD4           | 0.046202   | -0.00891   |
| CD8           | 0.038877   | 0.026317   |
| CD45RA        | 0.038415   | -0.05869   |
| CD127         | 0.03697    | 0.009139   |
| CD69          | 0.029454   | 0.037681   |
| CD28          | 0.027359   | 0.001804   |
| CCR7          | 0.025786   | -0.01655   |
| KLRG1         | 0.015328   | 0.016481   |
| PD_1          | 0.007538   | 0.033281   |
| CD57          | 0.007306   | -0.00865   |
| CXCR5         | 0.004977   | 0.009335   |
| CD103         | 0.003101   | 0.002303   |
| CD19          | 0.000995   | 0.015749   |
| FOXP3         | -0.00317   | 0.028677   |
| CD335         | -0.00361   | 0.002101   |
| CD25          | -0.00422   | 0.008298   |
| CD86          | -0.00468   | 0.015079   |
| CD56          | -0.00506   | -0.01521   |
| CD66B         | -0.00632   | 0.019469   |
| CD16          | -0.01384   | -0.00482   |
| TCRGD         | -0.01789   | 0.018678   |
| CD95          | -0.02823   | 0.005061   |
| HLA_DR        | -0.03622   | 0.074729   |
| CD163         | -0.08021   | -0.03492   |
| CD64          | -0.08127   | 0.019918   |
| CD11C         | -0.08342   | 0.031825   |
| CD14          | -0.10606   | -0.01016   |
| CD33          | -0.12646   | -0.0358    |

**Table S7. Related to Figures 1, 3, 4, 7.** Deceased donor information for control airway and blood samples and COVID-19 autopsy samples.

| <b>Donor Number</b> | <b>Status</b> | <b>Sex</b> | <b>Age</b> | <b>Flow/IF<sup>a</sup></b> |
|---------------------|---------------|------------|------------|----------------------------|
| D328                | Control       | M          | 52         | IF                         |
| D370                | Control       | M          | 52         | IF                         |
| D372                | Control       | M          | 68         | IF                         |
| D481                | Control       | M          | 29         | Flow                       |
| D484                | Control       | M          | 59         | Flow                       |
| D488                | Control       | M          | 55         | Flow                       |
| D489                | Control       | F          | 67         | Flow                       |
| D490                | Control       | M          | 26         | Flow                       |
| IMG001              | COVID-19      | M          | 73         | IF                         |
| IMG002              | COVID-19      | F          | 93         | IF                         |
| IMG003              | COVID-19      | M          | 71         | IF                         |
| IMG004              | COVID-19      | F          | 81         | IF                         |
| IMG005              | COVID-19      | M          | 63         | IF                         |

<sup>a</sup>Flow, flow cytometry; IF, Immunofluorescence imaging
